# Supplementary material for: Nusinersen in spinal muscular atrophy type 1 from neonates to young adult: 1-year data from three Asia-Pacific regions
Source: PubMed Central journal article supplement — J Neurol Neurosurg Psychiatry. 2021 Feb 11;92(11):1244–6. doi: 10.1136/jnnp-2020-324532 (PMC8522455; doi:10.1136/jnnp-2020-324532), 2021-02-11
Supplement: jnnp-2020-324532supp001.pdf [file jnnp-2020-324532supp001.pdf]

## Supplementary Table 1

## Clinical characteristics of the 40 patients with SMA type I before nusinersen treatment

|                                                                | South Korea       | Taiwan             | Hong Kong SAR   | Total n (%)                        |
|----------------------------------------------------------------|-------------------|--------------------|-----------------|------------------------------------|
| <b>No. of patients who received EAP</b>                        | <b>18</b>         | <b>15</b>          | <b>7</b>        | <b>40</b>                          |
| <b>No. of patients identified by newborn screening</b>         | <b>0</b>          | <b>9</b>           | <b>0</b>        | <b>9 (22.5%)</b>                   |
| <b>Age of symptom onset: median age in months (range)</b>      | 3.00<br>(0.03 -6) | 3.37<br>(0.03 - 5) | 3.0<br>(1-4.5)  | <b>3.0</b><br><b>(0.03-6)</b>      |
| <b>Nusinersen initiation age: median age in months (range)</b> | 23.0<br>(2-79)    | 4.9<br>(0.35-191)  | 51<br>(19 -294) | <b>20.0</b><br><b>(0.35 - 294)</b> |
| <b>SMN1 mutation</b>                                           |                   |                    |                 |                                    |
| Homozygous exon 7 deletion                                     | 18                | 14                 | 6               | <b>38 (95%)</b>                    |
| Compound heterozygous exon 7 deletion & point mutation         | -                 | 1                  | 1               | <b>2 (5%)</b>                      |
| <b>SMN2 copies</b>                                             |                   |                    |                 |                                    |
| 1 copy                                                         | 1                 | -                  | -               | <b>1 (2.5%)</b>                    |
| 2 copies                                                       | 13                | 9                  | 3               | <b>25 (62.5%)</b>                  |
| 3 copies                                                       | 4                 | 6                  | 4               | <b>14 (35.0%)</b>                  |
| <b>Gestational age</b>                                         |                   |                    |                 |                                    |
| Prematurity (<37 weeks gestation)                              | 2                 | 1                  | 0               | <b>3 (7.5%)</b>                    |
| Full term (≥37 weeks gestation)                                | 16                | 14                 | 7               | <b>37 (92.5%)</b>                  |
| <b>Nutritional status</b>                                      |                   |                    |                 |                                    |
| Body weight <3rd percentile                                    | 10                | 1                  | 0               | <b>11 (27.5%)</b>                  |
| Body weight ≥3rd percentile                                    | 8                 | 14                 | 7               | <b>29 (72.5%)</b>                  |
| <b>Ventilation status</b>                                      |                   |                    |                 |                                    |
| No ventilator support                                          | 3                 | 5                  | 1               | <b>9 (22.5%)</b>                   |
| Need ventilator support                                        | 15                | 10                 | 6               | <b>31 (77.5%)</b>                  |
| NIV <16 h per day                                              | 3                 | 9                  | 3               | <b>15</b>                          |
| NIV >16 h per day                                              | 3                 | 0                  | 3               | <b>6</b>                           |
| IV                                                             | 9                 | 1                  | 0               | <b>10</b>                          |
| <b>Feeding status</b>                                          |                   |                    |                 |                                    |
| Oral                                                           | 5                 | 8                  | 1               | <b>14 (35.0%)</b>                  |
| Tube feeding                                                   | 13                | 7                  | 6               | <b>26 (65.0%)</b>                  |
| Feeding tube                                                   | 5                 | 1                  | 1               | <b>7</b>                           |
| Gastrostomy                                                    | 8                 | 6                  | 5               | <b>19</b>                          |
| <b>Musculoskeletal status</b>                                  |                   |                    |                 |                                    |
| Scoliosis/kyphoscoliosis                                       | 5                 | 2                  | 4               | <b>11 (27.5%)</b>                  |
| Spinal fusion                                                  | 0                 | 0                  | 1               | <b>1</b>                           |
|                                                                | 7                 | 2                  | 5               | <b>14 (35.0%)</b>                  |
| <b>Hip subluxation/dislocation</b>                             |                   |                    |                 |                                    |
| Hip dislocation (both)                                         | 3                 | 1                  | 3               | <b>7</b>                           |
| Hip subluxation (both/unilateral)                              | 4 (2/2)           | 1 (1/0)            | 2 (2/0)         | <b>7 (5/2)</b>                     |

Abbreviation: EAP – Expanded Access Program; NIV – non-invasive ventilation; IV – invasive ventilation

## Supplementary Table 2

## Number of patients receiving Nusinersen treatment and CHOP INTEND and HINE-2 Evaluation

|                                                                                                             | South Korea                                       | Taiwan                                  | Hong Kong SAR                                                                           | Total                                                                                   |
|-------------------------------------------------------------------------------------------------------------|---------------------------------------------------|-----------------------------------------|-----------------------------------------------------------------------------------------|-----------------------------------------------------------------------------------------|
| <b>Participating Hospitals</b>                                                                              | 5                                                 | 2                                       | 1                                                                                       | 8                                                                                       |
| <b>Number of patients receiving EAP</b>                                                                     | 18                                                | 15                                      | 7                                                                                       | <b>40</b>                                                                               |
| <b>Age of nusinersen initiation: median age in months (range)</b>                                           | 23.0 (2-79)                                       | 4.9 (0.35-191)                          | 51 (19 -294)                                                                            | 20.0 (0.35 - 294)                                                                       |
| <b>Number of deaths during 1<sup>st</sup> year treatment</b>                                                | 1                                                 | 0                                       | 0                                                                                       | 1                                                                                       |
| <b>Number of patients dropped out during treatment</b>                                                      | 1                                                 | 0                                       | 0                                                                                       | 1                                                                                       |
| <b>Number of patients with sedation</b>                                                                     | LA only (14)<br>IV only (1)<br>LA + Oral + IV (3) | LA only (2)<br>IV only (9)<br>LA+IV (4) | LA only (2)<br>IV only (5)                                                              | LA only (18)<br>IV only (15)<br>Combined (7)                                            |
| <b>Number of patients who required X-ray guidance or special arrangements for intrathecal drug delivery</b> | Fluoroscopic guidance (8)                         | (0)                                     | Fluoroscopic guidance (1)<br>3D dynamic CT guidance (1)<br>Port-A-Cath implantation (1) | Fluoroscopic guidance (9)<br>3D dynamic CT guidance (1)<br>Port-A-Cath implantation (1) |
| <b>Number of patients undergone motor assessment</b>                                                        |                                                   |                                         |                                                                                         |                                                                                         |
| <b>CHOP INTEND Evaluation</b>                                                                               |                                                   |                                         |                                                                                         |                                                                                         |
| <b>M0</b>                                                                                                   | 12                                                | 3                                       | 6                                                                                       | 21                                                                                      |
| <b>M6</b>                                                                                                   | 12                                                | 3                                       | 6                                                                                       | 21                                                                                      |
| <b>M10</b>                                                                                                  | 9                                                 | 3                                       | 6                                                                                       | 18                                                                                      |
| <b>HINE-2 Evaluation</b>                                                                                    |                                                   |                                         |                                                                                         |                                                                                         |
| <b>M0</b>                                                                                                   | 18                                                | 13                                      | 6                                                                                       | 37                                                                                      |
| <b>M6</b>                                                                                                   | 15                                                | 13                                      | 6                                                                                       | 34                                                                                      |
| <b>M10</b>                                                                                                  | 12                                                | 12                                      | 6                                                                                       | 30                                                                                      |

Abbreviation: LA = local anaesthetics; IV = intravenous sedation; LP = lumbar puncture; CT = computed tomography

## Supplementary Table 3

CHOP INTEND evolution of patients according to *SMN2* copy number and age of nusinersen initiation

| Characteristics                                                      | Total<br>(n=40) <sup>a</sup> | 1 copy of <i>SMN2</i><br>(n=1) <sup>a</sup> | 2 copies of <i>SMN2</i><br>(n=25) <sup>a</sup> | 3 copies of <i>SMN2</i><br>(n=14) <sup>a</sup> |
|----------------------------------------------------------------------|------------------------------|---------------------------------------------|------------------------------------------------|------------------------------------------------|
| Sex, M: F, n                                                         | 18:22                        | 1:0                                         | 10:15                                          | 7:7                                            |
| Age at first symptoms <sup>a</sup>                                   | 3.0 (0.0-6.0)                | 0.0                                         | 2.0 (0.0-6.0)                                  | 4.5 (1.0-6.0)                                  |
| Age at first injection <sup>a</sup>                                  | 20.0 (0.35-294.0)            | 2.0                                         | 19.0 (0.35-140.0)                              | 25.3 (4.0-294.0)                               |
| <b>CHOP INTEND score</b>                                             |                              |                                             |                                                |                                                |
| M0 <sup>a</sup>                                                      | 12.0 (0.0-60.0), n=23        | 12.0, n=1                                   | 4.0 (0.0-39.0), n=13                           | 27.0 (0.0-60.0), n=9                           |
| M6 <sup>a</sup>                                                      | 30.0 (1.0-64.0), n=21        | 39.0, n=1                                   | 8.0 (1.0-52.0), n=12                           | 34.0 (21.0-64.0), n=8                          |
| M10 <sup>a</sup>                                                     | 31.5 (1.0-64.0), n=20        | 42.0, n=1                                   | 10.0 (1.0-62.0), n=11                          | 34.0 (24.0-64.0), n=8                          |
| Time-effect p value <sup>b</sup>                                     | <0.001                       | /                                           | 0.006                                          | <0.001                                         |
| Delta M6-M0 <sup>c</sup>                                             | 7.0 (0.0-39.0), p<0.001      | 27.0                                        | 3.0 (0.0-39.0), p=0.019 <sup>d</sup>           | 8.5 (1.0-19.0), p=0.005 <sup>d</sup>           |
| Delta M10-M0 <sup>c</sup>                                            | 8.5 (0.0-49.0), p<0.001      | 30.0                                        | 3.0 (0.0-49.0), p=0.030 <sup>d</sup>           | 8.5 (4.0-19.0), p=0.003 <sup>d</sup>           |
| <b>CHOP INTEND score (Age ≤2 years old at onset of treatment)</b>    |                              |                                             |                                                |                                                |
| M0 <sup>a</sup>                                                      | 11.0 (0.0-60.0), n=12        |                                             |                                                |                                                |
| M6 <sup>a</sup>                                                      | 34.0 (2.0-64.0), n=11        |                                             |                                                |                                                |
| M10 <sup>a</sup>                                                     | 38.0 (3.0-64.0), n=10        |                                             |                                                |                                                |
| Time-effect p value <sup>b</sup>                                     | 0.002                        |                                             |                                                |                                                |
| Delta M6-M0 <sup>c</sup>                                             | 5.0 (1.0-39.0), p=0.014      |                                             |                                                |                                                |
| Delta M10-M0 <sup>c</sup>                                            | 11.0 (1.0-49.0), p=0.014     |                                             |                                                |                                                |
| <b>CHOP INTEND score (Age &gt;2 years old at onset of treatment)</b> |                              |                                             |                                                |                                                |
| M0 <sup>a</sup>                                                      | 13.0 (0.0-31.0), n=11        |                                             |                                                |                                                |
| M6 <sup>a</sup>                                                      | 23.0 (1.0-46.0), n=10        |                                             |                                                |                                                |
| M10 <sup>a</sup>                                                     | 24.5 (1.0-47.0), n=10        |                                             |                                                |                                                |
| Time-effect p value <sup>b</sup>                                     | <0.001                       |                                             |                                                |                                                |
| Delta M6-M0 <sup>c</sup>                                             | 6.5 (0.0-19.0), p=0.006      |                                             |                                                |                                                |
| Delta M10-M0 <sup>c</sup>                                            | 6.5 (0.0-19.0), p=0.005      |                                             |                                                |                                                |

Abbreviations: CHOP INTEND = Children's Hospital of Philadelphia Infant Test of Neuromuscular Disorders; M0 = before treatment; M6 = 6 months of treatment; M10 = 10 months of treatment; *SMN* = survival motor neuron.

<sup>a</sup> Data are listed as median (range) in months.

<sup>b</sup> One-way-repeated-measures ANOVA.

<sup>c</sup> Paired T-test.

<sup>d</sup> The multiple regression demonstrated that there was significant difference in the changes of the CHOP INTEND scores Delta M6-M0 and Delta M10-M0, between the two groups with 2 and 3 *SMN2* copies with a standardized coefficients  $\beta$  of 0.440 ( $p < 0.001$ ).

CHOP-INTEND scores were missing in 19 patients, due to the following two reasons: 1). 12 patients did not have CHOP-INTEND performed: 2). 7 patients had incomplete CHOP-INTEND scores at either baseline or at M6 or M10 so no paired data were available for analysis.

**Supplementary Table 4****Multiple linear regression model for changes in HINE-2 (M10-M0) and CHOP INTEND (M10-M0) scores**

| Dependent variables                                            | Factors                     | Correlation | P-value | Standardized Coefficients Beta | P-value |
|----------------------------------------------------------------|-----------------------------|-------------|---------|--------------------------------|---------|
| Changes in HINE-2 scores<br>N=32<br>r <sup>2</sup> =0.479      | Disease duration            | -0.391      | 0.027*  | -0.302                         | 0.069   |
|                                                                | SMN2 copy number            | 0.144       | 0.430   | 0.099                          | 0.607   |
|                                                                | Baseline HINE-2 scores      | 0.377       | 0.033*  | 0.292                          | 0.117   |
|                                                                | Newborn screening           | 0.557       | 0.001*  | 0.424                          | 0.009*  |
| Changes in CHOP-INTEND Scores<br>N=18<br>r <sup>2</sup> =0.159 | Disease duration            | -0.172      | 0.494   | 0.046                          | 0.889   |
|                                                                | SMN2 copy number            | -0.292      | 0.240   | -0.506                         | 0.195   |
|                                                                | Baseline CHOP-INTEND scores | 0.047       | 0.852   | 0.486                          | 0.338   |
|                                                                | Newborn screening           | 0.018       | 0.942   | -0.219                         | 0.623   |

\* p < 0.05

The multiple linear regression shown that only newborn screening was independently associated with delta HINE-2 scores with the model r-square value of 0.479, adjusted beta=0.424 (p=0.009).

We could not find any predictor variable for the Delta CHOP INTEND (M10-M0) scores. We understand the limitations when interpreted the findings as only half of this cohort had paired CHOP INTEND scores at M0 and M10 (n=18), and only one patient with paired CHOP INTEND scores was identified by newborn screening.

## Supplementary Table 5

## Changes in the requirement of ventilation support at M6 and M10, compared to baseline M10

|                                                           | Ventilator support |                          |                           |             |               | Patient number (n)                                  |
|-----------------------------------------------------------|--------------------|--------------------------|---------------------------|-------------|---------------|-----------------------------------------------------|
|                                                           | No Need            | Nocturnal NIV            | Nocturnal & Day < 24h NIV | 24 h NIV    | 24 h IV       | Change in ventilation status                        |
| <b>For all 40 patients receiving nusinersen treatment</b> |                    |                          |                           |             |               |                                                     |
| <b>M0</b>                                                 |                    |                          |                           |             |               |                                                     |
| Patient number                                            | 11                 | 12                       | 3                         | 10          | 4             | n = 40                                              |
| 1 <sup>st</sup> Tx age (months)                           | (0.35 -24)         | (1.3-191)                | (53.6-294)                | (2-150)     | (5 -140)      |                                                     |
| <b>M10 - M0</b>                                           |                    |                          |                           |             |               |                                                     |
| Patient number                                            | 11                 | 12                       | 3                         | 8 #, @      | 4             | n = 38 #, @                                         |
| Status same                                               | 8                  | 9                        | 2                         | 2           | 1             | Same Ventilation setting:<br>57.8% (22/38 patients) |
| ↓ ventilation need                                        | -                  | 1 off NIV<br>2 ↓ setting | 1 to Noct. NIV            | 3 ↓ setting | 1 to Noct. IV | ↓ ventilation need:<br>21.1% (8/38 patients)        |
| ↑ ventilation need                                        | 3 started NIV      | -                        | -                         | 3 ↑ setting | 2 ↑ setting   | ↑ ventilation need:<br>21.1% (8/38patients)         |

Findings: Among the 38 patients who continued the EAP at M10, 57.8% of patients had same ventilation status. An equal percentage (21.1%) of patients had a decreased ventilation need (off NIV, ↓ NIV duration, ↓ ventilation setting) as those with an increased ventilation need (need to start on nocturnal NIV, ↑ ventilation setting).

Abbreviations: M0 = before treatment; M6 = 6 months of treatment; M10 = 10 months of treatment; h=hours; Noct. = nocturnal; NIV = Non-invasive ventilation; IV= Invasive ventilation; m=months; Ax = assessment; Tx age = Nusinersen treatment starting age; # 1 patient died before M6 treatment; @ 1 patient dropped out after M6 treatment

## Figure Legends

**Supplementary Figure 1. Longitudinal HINE-2 score according to the age of first nusinersen treatment.** Different shapes of dots indicate different months of nusinersen treatment (M0: circle; M6: triangle; M10: square). Total number of patients = 35. *SMN2* copy numbers and newborn screening are color-coded.

**Supplementary Figure 2. Longitudinal CHOP INTEND score according to the age of first nusinersen treatment.** Different shapes of dots indicate different months of nusinersen treatment (M0: circle; M6: triangle; M10: square). Total number of patients = 25. Five patients had <3 evaluations. *SMN2* copy numbers and newborn screening are color-coded.
