# Supplementary figures and images for: Nusinersen in spinal muscular atrophy type 1 from neonates to young adult: 1-year data from three Asia-Pacific regions
Source: PubMed Central journal article supplement — J Neurol Neurosurg Psychiatry. 2021 Feb 11;92(11):1244–6. doi: 10.1136/jnnp-2020-324532 (PMC8522455; doi:10.1136/jnnp-2020-324532), 2021-02-11

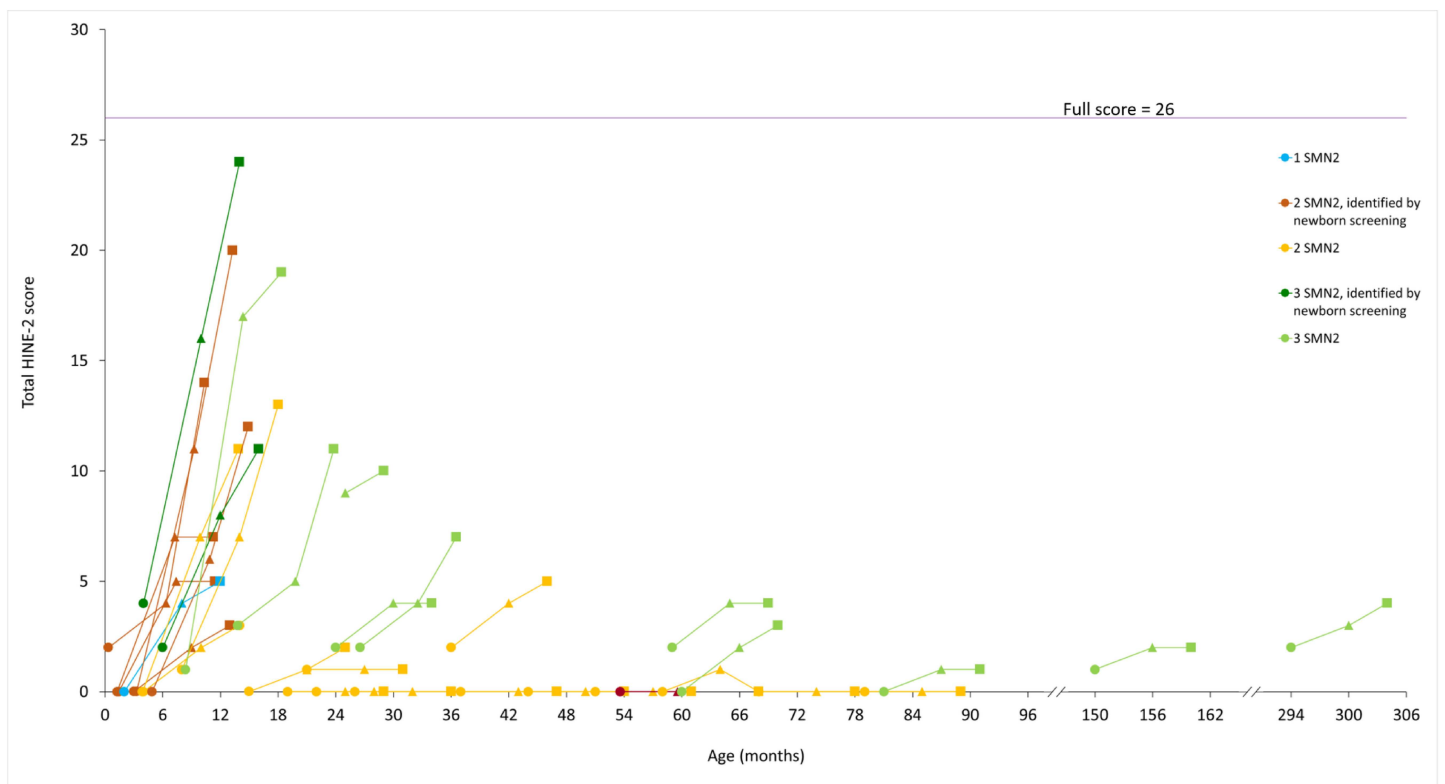

Supplement: jnnp-2020-324532supp002.pdf [file jnnp-2020-324532supp002.pdf]

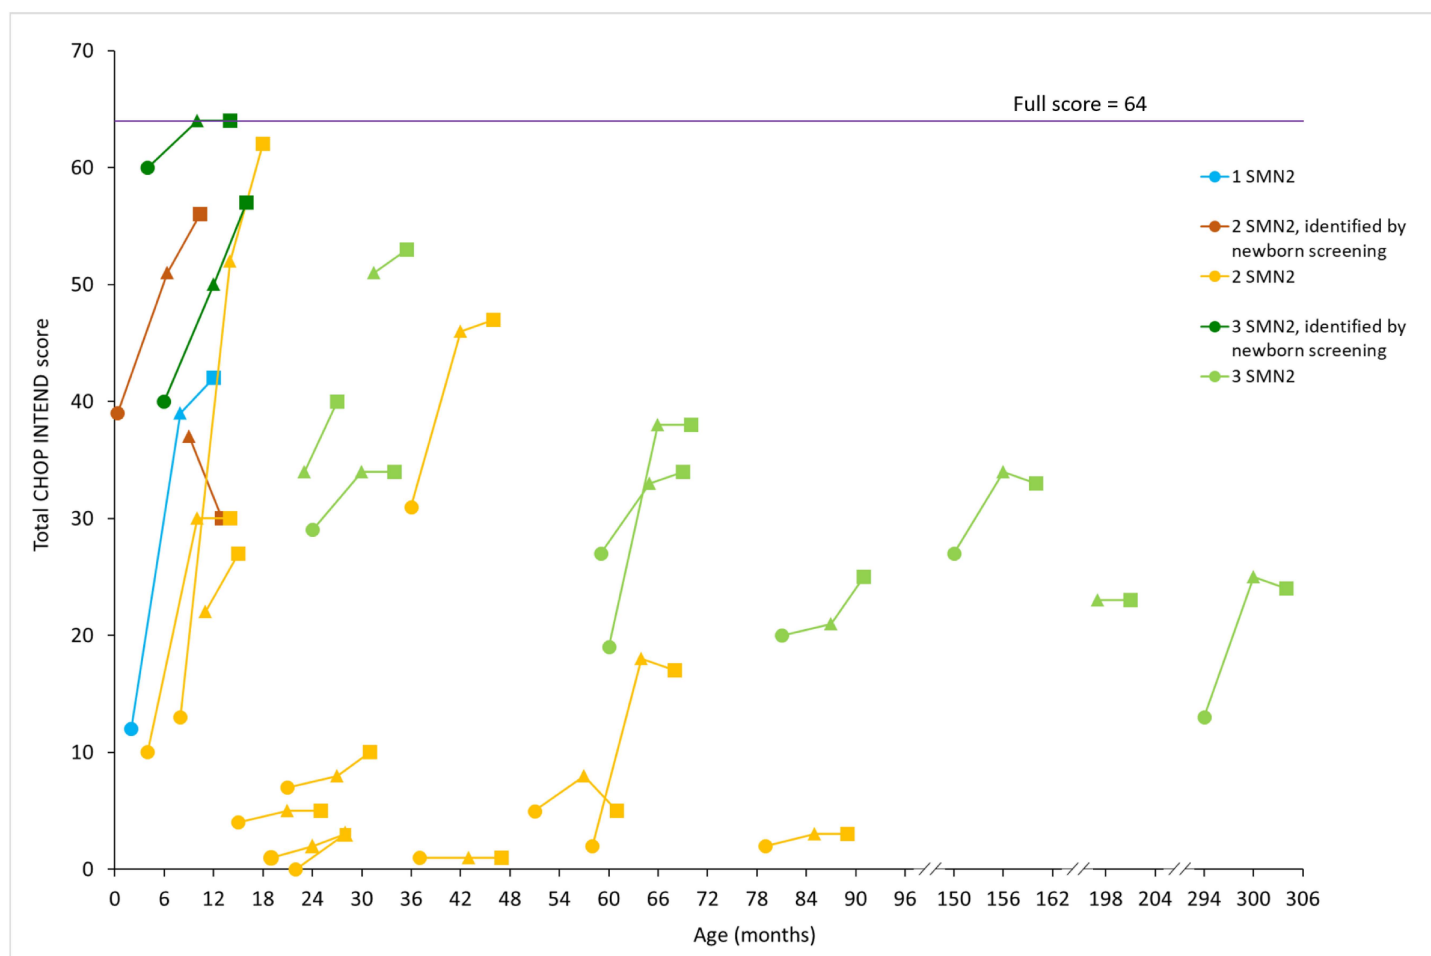

Supplement: jnnp-2020-324532supp003.pdf [file jnnp-2020-324532supp003.pdf]
